# Supplementary material for: Adherence to the Mediterranean Diet Is Associated with Better Metabolic Features in Youths with Type 1 Diabetes
Source: MDPI journal article supplement (doi:10.3390/nu14030596), 2022-01-29
Supplement: s1 [file s1]

**Table S1.** KIDMED items.<sup>1</sup>Items with positive answer (+1).<sup>2</sup>Items with a negative score (-1).

| KIDMED Items                                                                    |
|---------------------------------------------------------------------------------|
| Consumption of a fruit or a fruit juice every day <sup>1</sup>                  |
| Consumption of a second fruit every day <sup>1</sup>                            |
| Consumption of raw or cooked vegetables 1 time a day <sup>1</sup>               |
| Consumption of raw or cooked vegetables >1 time a day <sup>1</sup>              |
| Consumption of fish regularly (at least 2–3 times a week) <sup>1</sup>          |
| Eating >1 time per week to a fast-food (hamburger) restaurant <sup>2</sup>      |
| Consumption of beans >1 time per week <sup>1</sup>                              |
| Consumption of pasta or rice almost every day (≥5 times a week) <sup>1</sup>    |
| Consumption of cereals or grains (bread etc.) for breakfast <sup>1</sup>        |
| Consumption of nuts regularly (at least 2-3 times per week) <sup>1</sup>        |
| Consumption of olive oil at home <sup>1</sup>                                   |
| Skipping breakfast <sup>2</sup>                                                 |
| Consumption of a dairy product for breakfast (yoghurts, milks etc) <sup>1</sup> |
| Consumption of commercially baked goods or pastries for breakfast <sup>2</sup>  |
| Consumption of 2 yoghurts and/or cheese (40 g) daily <sup>1</sup>               |
| Consumption of sweets or candy several times every day <sup>2</sup>             |

**Table S2.** Descriptive characteristics of specific IPAQ-A (Italian version) items in the sample.

|                                                      | Full Sample                                   | Males                                                                                             | Females                                                                                 | <i>p</i> -value                                                            |       |
|------------------------------------------------------|-----------------------------------------------|---------------------------------------------------------------------------------------------------|-----------------------------------------------------------------------------------------|----------------------------------------------------------------------------|-------|
| School related physical activity                     | n° of sports lessons                          | 0 (7) 21.9%; 1 (19) 59.4%; 2 (5) 15.6%; 4 (1) 3.1%                                                | 0 (8) 24.2%; 1 (17) 51.5%; 2 (8) 24.2%                                                  | 0.901                                                                      |       |
|                                                      | mins of walking during sports lessons         | 18.77 ± 24.70                                                                                     | 19.69 ± 26.27                                                                           | 17.88 ± 23.45                                                              | 0.770 |
|                                                      | mins of sport during sports lessons           | 60.15 ± 44.76                                                                                     | 66.56 ± 46.15                                                                           | 53.94 ± 43.17                                                              | 0.259 |
|                                                      | days vigorous physical activity during school | 0 (63) 96.9%; 5 (2) 3.1%                                                                          | 0 (30) 93.8%; 5 (2) 6.3%                                                                | 0 (33) 100%                                                                | 0.148 |
|                                                      | minutes of vigorous activity during school    | 0.92 ± 5.86                                                                                       | 1.87 ± 8.30                                                                             | 0.00 ± 0.00                                                                | 0.199 |
|                                                      | days moderate physical activity during school | 0 (63) 96.9%; 2 (1) 1.5%; 3 (1) 1.5%                                                              | 0 (31) 96.9%; 2 (1) 3.1%                                                                | 0 (32) 97%; 3 (1) 3%                                                       | 1.000 |
|                                                      | minutes of moderate activity during school    | 1.38 ±8.27                                                                                        | 1.87 ± 10.61                                                                            | 0.91 ±5.22                                                                 | 0.641 |
|                                                      | days of walking during school                 | 0 (64) 98.5%; 5 (1) 1.5%                                                                          | 0 (31) 96.9%; 5 (1) 3.1%                                                                | 0 (33) 100%                                                                | 0.310 |
|                                                      | minutes of walking during school              | 0.31 ± 2.48                                                                                       | 0.63 ± 3.54                                                                             | 0.00 ± 0.00                                                                | 0.314 |
| Home related physical activity                       | days of moderate activity at home             | 0 (25) 38.5%; 1 (12) 18.5%; 2 (12) 18.5%; 3 (7) 10.8%; 5 (1) 1.5%; 6 (1) 1.5%; 7 (7) 10.8%        | 0 (15) 46.9%; 1 (5) 15.6%; 2 (5) 15.6%; 3 (4) 12.5%; 5 (1) 3.1%; 7 (2) 6.3%             | 0 (10) 30.3%; 1 (7) 21.2%; 2 (7) 21.2%; 3 (3) 9.1%; 6 (1) 3%; 7 (5) 15.2%  | 0.205 |
|                                                      | minutes of moderate activity at home          | 29.54 ± 47.00                                                                                     | 25.94 ± 52.39                                                                           | 33.03 ± 41.64                                                              | 0.547 |
| Physical activity during travels or moving to school | days travelling with motorized transport      | 0 (4) 6.2%; 1 (1) 1.5%; 2 (6) 9.2%; 3 (2) 3.1%; 5 (40) 61.5%; 6 (1) 1.5%; 7 (11) 16.9%            | 0 (3) 9.4%; 1 (1) 3.1%; 2 (4) 12.5%; 3 (1) 3.1%; 5 (18) 56.3%; 7 (5) 15.6%              | 0 (1) 3%; 2 (2) 6.1%; 3 (1) 3%; 5 (22) 66.7%; 6 (1) 3%; 7 (6) 18.2%        | 0.157 |
|                                                      | minutes travelling with motorized transport   | 37.85 ± 37.11                                                                                     | 43.75 ± 44.27                                                                           | 32.12 ± 28.06                                                              | 0.209 |
|                                                      | days travelling using bike                    | 0 (56) 86.2%; 1 (2) 3.1%; 2 (3) 4.6%; 3 (2) 3.1%; 4 (1) 1.5%; 5 (1) 1.5%                          | 0 (28) 87.5%; 1 (1) 3.1%; 2 (2) 6.3%; 4 (1) 3.1%                                        | 0 (28) 84.8%; 1 (1) 3%; 2 (1) 3%; 3 (2) 6.1%; 5 (1) 3%                     | 0.718 |
|                                                      | minutes travelling using bike                 | 6.38 ± 19.91                                                                                      | 9.38 ± 26.87                                                                            | 03.48 ± 08.70                                                              | 0.236 |
|                                                      | days of travelling by foot                    | 0 (19) 29.2; 1 (5) 7.7; 2 (8) 12.3%; 3 (2) 3.1%; 4 (1) 1.5%; 5 (21) 32.3%; 7 (9) 13.8%            | 0 (11) 34.4%; 1 (1) 3.1%; 2 (4) 12.5%; 3 (1) 3.1%; 4 (1) 3.1%; 5 (11) 34.4%; 7 (3) 9.4% | 0 (8) 24.2%; 1 (4) 12.1%; 2 (4) 12.1%; 3 (1) 3%; 5 (10) 30.3%; 7 (6) 18.2% | 0.477 |
|                                                      | minutes travelling by foot                    | 25.78 ± 34.23                                                                                     | 17.69 ± 20.85                                                                           | 33.64 ± 42.34                                                              | 0.006 |
| Other sources of physical activity                   | other days of vigorous activity               | 0 (34) 52.3%; 1 (7) 10.8%; 2 (12) 18.5%; 3 (8) 12.3%; 4 (4) 6.2%                                  | 0 (15) 46.9%; 1 (4) 12.5%; 2 (5) 15.6%; 3 (5) 15.6%; 4 (3) 9.4%                         | 0 (19) 57.6%; 1 (3) 9.1%; 2 (7) 21.2%; 3 (3) 9.1%; 4 (1) 3%                | 0.292 |
|                                                      | minutes of other days of vigorous activity    | 42.54 ± 48.89                                                                                     | 47.81 ± 49.30                                                                           | 37.42 ± 48.70                                                              | 0.396 |
|                                                      | other days of moderate activity               | 0 (45) 69.2%; 1 (7) 10.8%; 2 (5) 7.7%; 3 (2) 3.1%; 4 (2) 3.1%; 5 (2) 3.1%; 6 (1) 1.5%; 7 (1) 1.5% | 0 (21) 65.6%; 1 (4) 12.5%; 2 (3) 9.4%; 4 (2) 6.3%; 5 (1) 3.1%; 6 (1) 3.1%               | 0 (24) 72.7%; 1 (3) 9.1%; 2 (2) 6.1%; 3 (2) 6.1%; 5 (1) 3%; 7 (1) 3%       | 0.568 |

|                                                |                                                                                                                                                          |               |                |       |
|------------------------------------------------|----------------------------------------------------------------------------------------------------------------------------------------------------------|---------------|----------------|-------|
| <b>minutes other days of moderate activity</b> | 26.54 ± 47.18                                                                                                                                            | 28.13 ± 50.19 | 25.00 ± 44.79  | 0.792 |
| <b>other days walking</b>                      | 0 (54) 83.1%; 1 (2) 3.1%; 2 (3) 4.6%; 3 (3) 4.6%; 7 (3) 0 (27) 84.4%; 1 (1) 3.1%; 2 (1) 3.1%; 3 (2) 6.3%; 0 (27) 81.8%; 1 (1) 3%; 2 (2) 6.1%; 3 (1) 4.6% | 7 (1) 3.1%    | 3%; 7 (2) 6.1% | 0.778 |
| <b>minutes other days walking</b>              | 12.54 ± 31.67                                                                                                                                            | 11.25 ± 28.26 | 13.79 ± 35.07  | 0.750 |

Continuous variables (minutes of physical activity) are expressed as mean ± standard deviation while qualitative variables (days) are expressed as frequencies and percentages.

**Table S3.** Correlations between clinical characteristics and KIDMED items.

|                                   | KIDMED | KIDMED<br>low-<br>medium-<br>high | Fruit<br>1 | Fruit 2 | Vegetable<br>1 | Vegetable<br>2 | Fish   | Fast<br>Food | Legumes | Pasta and<br>cereals | Cereals at<br>breakfast | Nuts    | Extra vir-<br>gin olive<br>oil | Skip<br>breakfast | Milk/dairy at<br>breakfast | Processed<br>food at<br>breakfast | Dairy<br>food<br>2/day | Sweets and<br>candies |
|-----------------------------------|--------|-----------------------------------|------------|---------|----------------|----------------|--------|--------------|---------|----------------------|-------------------------|---------|--------------------------------|-------------------|----------------------------|-----------------------------------|------------------------|-----------------------|
| <b>Gender</b>                     | 0.212  | 0.240                             | .366**     | 0.169   | -0.092         | -0.012         | 0.017  | -0.127       | -0.109  | 0.175                | 0.179                   | 0.184   | 0.123                          | 0.044             | 0.059                      | .325**                            | .265*                  | -0.077                |
| <b>Age</b>                        | -0.001 | 0.011                             | -<br>0.176 | -0.172  | -0.011         | 0.061          | -0.067 | -0.027       | 0.011   | 0.014                | 0.059                   | 0.119   | -0.193                         | -0.124            | -0.218                     | 0.114                             | .280*                  | -0.007                |
| <b>Weight z-score</b>             | 0.046  | -0.033                            | -<br>0.068 | 0.035   | 0.091          | 0.202          | -0.002 | 0.020        | 0.240   | -0.014               | -0.054                  | -0.114  | -0.187                         | -.407**           | 0.000                      | -0.167                            | -0.178                 | 0.062                 |
| <b>Height z-score</b>             | 0.078  | 0.087                             | 0.032      | 0.103   | -0.065         | 0.142          | 0.137  | 0.092        | 0.010   | 0.170                | -0.035                  | 0.073   | -0.126                         | -0.005            | -0.098                     | -0.144                            | 0.017                  | 0.012                 |
| <b>BMI</b>                        | -0.028 | -0.112                            | -<br>0.143 | -0.095  | 0.119          | 0.145          | -0.094 | -0.038       | .251*   | -0.088               | -0.058                  | -0.179  | -0.188                         | -.405**           | 0.002                      | -0.134                            | -0.147                 | 0.024                 |
| <b>BMI-SDS</b>                    | -0.030 | -0.112                            | -<br>0.106 | -0.061  | 0.112          | 0.121          | -0.080 | -0.010       | .264*   | -0.092               | -0.079                  | -0.198  | -0.188                         | -.413**           | 0.021                      | -0.176                            | -0.196                 | 0.069                 |
| <b>BMI IOTF</b>                   | -0.083 | -0.151                            | -<br>0.039 | -0.055  | 0.147          | 0.172          | -0.125 | 0.052        | 0.209   | -0.098               | -.248*                  | -.425** | -0.190                         | -.317*            | 0.012                      | -0.176                            | -.306*                 | 0.048                 |
| <b>HbA1c</b>                      | -0.191 | -0.209                            | 0.019      | -0.125  | -0.209         | -0.138         | -.269* | -0.050       | 0.031   | 0.164                | -0.060                  | -0.009  | 0.013                          | 0.050             | -0.022                     | -0.018                            | -0.013                 | -.347**               |
| <b>SBP</b>                        | -0.058 | -0.046                            | -<br>0.021 | -0.144  | 0.038          | 0.129          | -0.039 |              | 0.130   | -0.082               | -0.147                  | -0.010  | -0.216                         | 0.037             | -.291*                     | -0.005                            | 0.007                  | -0.009                |
| <b>DBP</b>                        | -0.033 | -0.144                            | -<br>0.100 | -0.128  | -0.062         | 0.191          | 0.088  |              | 0.149   | -0.221               | -.264*                  | -0.057  | -0.211                         | -0.133            | -0.168                     | 0.191                             | -0.162                 | 0.119                 |
| <b>Years from diagno-<br/>sis</b> | 0.004  | -0.049                            | -<br>0.138 | -0.194  | 0.084          | 0.019          | -0.121 | 0.003        | 0.027   | -0.076               | 0.121                   | -0.007  | -0.187                         | 0.008             | -0.048                     | 0.179                             | 0.095                  | -0.102                |
| <b>UI/Kg/die</b>                  | -0.121 | -0.109                            | 0.034      | -0.146  | 0.105          | -0.199         | -0.068 | -0.020       | 0.188   | 0.128                | -0.011                  | -0.069  | -0.067                         | 0.061             | -0.082                     | -0.201                            | 0.037                  | -0.077                |
| <b>Glucose</b>                    | -0.236 | -0.304                            | 0.160      | -0.308  | -0.220         | 0.004          | -.431* |              | 0.062   | 0.257                | -.418*                  | -0.033  | -0.143                         | -0.046            | 0.096                      | -0.219                            | -0.076                 | -0.242                |
| <b>TIR %</b>                      | 0.230  | 0.258                             | -<br>0.233 | 0.208   | 0.017          | -0.053         | .390*  |              | -0.132  | -0.238               | .427*                   | 0.141   | 0.146                          | 0.156             | -0.117                     | 0.270                             | 0.075                  | 0.172                 |
| <b>TC</b>                         | 0.039  | 0.003                             | 0.007      | 0.113   | 0.133          | 0.003          | -0.119 | 0.169        | 0.202   | -0.039               | -0.011                  | -0.084  | 0.000                          | 0.047             | 0.218                      | -0.193                            | -0.217                 | -0.085                |
| <b>HDL-C</b>                      | -0.001 | -0.048                            | -<br>0.033 | -0.129  | 0.025          | -0.092         | -0.101 | 0.143        | 0.004   | 0.033                | 0.121                   | -0.003  | 0.118                          | 0.037             | 0.054                      | 0.078                             | -0.017                 | -0.185                |
| <b>TG</b>                         | 0.001  | -0.028                            | 0.030      | 0.014   | -0.007         | -0.079         | 0.050  | 0.172        | 0.055   | 0.046                | 0.002                   | -0.233  | -0.111                         | -0.084            | 0.164                      | -0.127                            | -0.102                 | 0.048                 |
| <b>LDL-c</b>                      | 0.098  | 0.081                             | 0.021      | 0.243   | 0.214          | 0.085          | -0.095 | 0.086        | 0.229   | -0.086               | -0.002                  | -0.013  | -0.038                         | 0.130             | 0.173                      | -0.224                            | -0.108                 | -0.067                |
| <b>Insulin B/I</b>                | -0.016 | -0.048                            | -<br>0.137 | -0.062  | 0.099          | 0.096          | -0.005 | 0.083        | -0.149  | -.267*               | 0.085                   | -0.018  | 0.083                          | 0.124             | 0.040                      | 0.026                             | -0.206                 | 0.083                 |

\*,  $p < 0.05$ ; \*\*,  $p < 0.01$ . BMI—Body mass index, BMI-SDS—standardized Body mass index, SBP—systolic blood pressure, DBP—diastolic blood pressure, HbA1c—glycated hemoglobin, TIR—Time in range; TC: Total cholesterol; HDL-C—High density lipoprotein cholesterol; TG—triglycerides; LDL-C—Low density lipoprotein cholesterol; Insulin B/I—treatment with B=1—basal bolus injections or I=2—intravenous infuser.

**Table S4.** Correlations between clinical characteristics and IPAQ-A items.

|                      |                 | n° sports lessons | minutes of walking during sports lessons | mins of sport during sports lessons | days vigorous physical activity during school | minutes of vigorous activity during school | days moderate physical activity during school | minutes of moderate activity during school | days of walking during school | minutes of walking during school | days of moderate activity at home | minutes of moderate activity at home | days travelling with motorized transportation | minutes travelling with motorized transport | days travelling using bike | minutes travelling using bike | days of travelling by foot | minutes travelling by foot | other days of vigorous activity | minutes of other days of vigorous activity | other days of moderate activity | minutes of other days of moderate activity | other days walking | minutes other days walking | 3,3 MET | 4 MET  | 8 MET  | total MET week |
|----------------------|-----------------|-------------------|------------------------------------------|-------------------------------------|-----------------------------------------------|--------------------------------------------|-----------------------------------------------|--------------------------------------------|-------------------------------|----------------------------------|-----------------------------------|--------------------------------------|-----------------------------------------------|---------------------------------------------|----------------------------|-------------------------------|----------------------------|----------------------------|---------------------------------|--------------------------------------------|---------------------------------|--------------------------------------------|--------------------|----------------------------|---------|--------|--------|----------------|
| Gender               | $\rho$ Spearman | -0.015            | 0.032                                    | 0.132                               | 0.181                                         | 0.181                                      | 0.000                                         | 0.005                                      | 0.127                         | 0.127                            | -0.158                            | -0.213                               | -0.177                                        | 0.137                                       | -0.045                     | -0.011                        | -0.089                     | -0.169                     | 0.132                           | 0.117                                      | 0.071                           | 0.048                                      | -0.035             | -0.039                     | -0.121  | 0.078  | 0.141  | 0.117          |
|                      | $p$ -value      | 0.903             | 0.799                                    | 0.294                               | 0.149                                         | 0.149                                      | 1.000                                         | 0.965                                      | 0.314                         | 0.314                            | 0.208                             | 0.089                                | 0.159                                         | 0.278                                       | 0.721                      | 0.931                         | 0.481                      | 0.180                      | 0.295                           | 0.355                                      | 0.572                           | 0.703                                      | 0.781              | 0.758                      | 0.335   | 0.539  | 0.262  | 0.352          |
| Age                  | $\rho$ Spearman | -.403**           | -.290*                                   | -0.017                              | -0.199                                        | -0.200                                     | -.285*                                        | -.285*                                     | 0.000                         | 0.000                            | .254*                             | .328**                               | 0.100                                         | 0.231                                       | -0.001                     | -0.017                        | .362**                     | .326**                     | -0.098                          | -0.146                                     | 0.099                           | 0.163                                      | 0.178              | 0.175                      | .391**  | -0.051 | -0.147 | 0.014          |
|                      | $p$ -value      | 0.001             | 0.019                                    | 0.895                               | 0.111                                         | 0.110                                      | 0.021                                         | 0.022                                      | 1.000                         | 1.000                            | 0.041                             | 0.008                                | 0.427                                         | 0.064                                       | 0.996                      | 0.893                         | 0.003                      | 0.008                      | 0.438                           | 0.245                                      | 0.434                           | 0.194                                      | 0.157              | 0.163                      | 0.001   | 0.687  | 0.242  | 0.914          |
| Weight z-score       | $\rho$ Spearman | -0.207            | -0.235                                   | -.382**                             | -0.147                                        | -0.148                                     | 0.022                                         | 0.016                                      | -0.193                        | -0.193                           | .306*                             | 0.102                                | 0.058                                         | -0.001                                      | 0.205                      | 0.190                         | 0.001                      | 0.055                      | -0.100                          | -0.231                                     | -0.029                          | -0.073                                     | 0.100              | 0.081                      | 0.175   | -0.174 | -0.158 | -0.133         |
|                      | $p$ -value      | 0.099             | 0.060                                    | 0.002                               | 0.242                                         | 0.238                                      | 0.862                                         | 0.900                                      | 0.123                         | 0.123                            | 0.013                             | 0.417                                | 0.644                                         | 0.992                                       | 0.102                      | 0.129                         | 0.993                      | 0.664                      | 0.429                           | 0.065                                      | 0.817                           | 0.565                                      | 0.427              | 0.520                      | 0.164   | 0.166  | 0.210  | 0.293          |
| Height z-score       | $\rho$ Spearman | 0.110             | 0.074                                    | -0.142                              | -0.039                                        | -0.039                                     | -0.003                                        | -0.006                                     | -0.201                        | -0.201                           | 0.154                             | -0.052                               | -0.024                                        | -0.238                                      | 0.192                      | 0.178                         | 0.036                      | -0.120                     | 0.116                           | -0.006                                     | 0.079                           | 0.056                                      | -0.199             | -0.220                     | -0.058  | -0.005 | 0.088  | 0.077          |
|                      | $p$ -value      | 0.385             | 0.564                                    | 0.264                               | 0.760                                         | 0.759                                      | 0.979                                         | 0.960                                      | 0.111                         | 0.111                            | 0.226                             | 0.681                                | 0.848                                         | 0.059                                       | 0.128                      | 0.158                         | 0.777                      | 0.347                      | 0.363                           | 0.965                                      | 0.535                           | 0.662                                      | 0.114              | 0.081                      | 0.650   | 0.969  | 0.489  | 0.545          |
| BMI                  | $\rho$ Spearman | -.353**           | -.363**                                  | -.398**                             | -0.199                                        | -0.201                                     | -0.060                                        | -0.067                                     | -0.113                        | -0.113                           | .291*                             | 0.188                                | 0.065                                         | 0.201                                       | 0.160                      | 0.150                         | 0.062                      | 0.175                      | -0.199                          | -.296*                                     | -0.019                          | -0.028                                     | .254*              | 0.242                      | .312*   | -0.185 | -.264* | -0.191         |
|                      | $p$ -value      | 0.004             | 0.003                                    | 0.001                               | 0.114                                         | 0.111                                      | 0.639                                         | 0.601                                      | 0.376                         | 0.376                            | 0.019                             | 0.137                                | 0.609                                         | 0.111                                       | 0.206                      | 0.236                         | 0.627                      | 0.167                      | 0.116                           | 0.017                                      | 0.879                           | 0.827                                      | 0.043              | 0.054                      | 0.012   | 0.144  | 0.035  | 0.132          |
| BMI-SDS              | $\rho$ Spearman | -.298*            | -.314*                                   | -.377**                             | -0.170                                        | -0.172                                     | 0.018                                         | 0.011                                      | -0.119                        | -0.119                           | .296*                             | 0.148                                | 0.076                                         | 0.125                                       | 0.181                      | 0.170                         | 0.009                      | 0.131                      | -0.196                          | -.300*                                     | -0.033                          | -0.066                                     | 0.217              | 0.208                      | .257*   | -0.168 | -.260* | -0.195         |
|                      | $p$ -value      | 0.017             | 0.012                                    | 0.002                               | 0.179                                         | 0.174                                      | 0.886                                         | 0.932                                      | 0.348                         | 0.348                            | 0.018                             | 0.244                                | 0.550                                         | 0.325                                       | 0.153                      | 0.180                         | 0.944                      | 0.301                      | 0.121                           | 0.016                                      | 0.796                           | 0.602                                      | 0.086              | 0.099                      | 0.040   | 0.185  | 0.038  | 0.122          |
| BMI IOTF             | $\rho$ Spearman | -0.159            | -.271*                                   | -.270*                              | -0.221                                        | -0.224                                     | 0.101                                         | 0.096                                      | -0.052                        | -0.052                           | 0.157                             | 0.131                                | 0.144                                         | 0.143                                       | 0.129                      | 0.126                         | 0.033                      | 0.221                      | -0.184                          | -.302*                                     | -0.053                          | -0.045                                     | 0.200              | 0.219                      | 0.201   | -0.076 | -.249* | -0.152         |
|                      | $p$ -value      | 0.210             | 0.031                                    | 0.031                               | 0.079                                         | 0.076                                      | 0.427                                         | 0.452                                      | 0.684                         | 0.684                            | 0.216                             | 0.301                                | 0.258                                         | 0.261                                       | 0.311                      | 0.323                         | 0.793                      | 0.080                      | 0.147                           | 0.015                                      | 0.676                           | 0.724                                      | 0.113              | 0.083                      | 0.112   | 0.550  | 0.047  | 0.231          |
| HbA1c                | $\rho$ Spearman | 0.076             | 0.007                                    | 0.031                               | 0.131                                         | 0.131                                      | -0.087                                        | -0.080                                     | -0.083                        | -0.083                           | -0.153                            | -0.103                               | -0.079                                        | -0.204                                      | -.266*                     | -.276*                        | -0.047                     | -0.225                     | 0.118                           | 0.152                                      | -0.023                          | 0.010                                      | 0.009              | -0.027                     | -0.233  | 0.009  | 0.160  | 0.147          |
|                      | $p$ -value      | 0.547             | 0.957                                    | 0.807                               | 0.300                                         | 0.300                                      | 0.493                                         | 0.528                                      | 0.509                         | 0.509                            | 0.222                             | 0.415                                | 0.529                                         | 0.103                                       | 0.032                      | 0.026                         | 0.710                      | 0.071                      | 0.349                           | 0.226                                      | 0.854                           | 0.935                                      | 0.943              | 0.833                      | 0.062   | 0.945  | 0.203  | 0.242          |
| SBP                  | $\rho$ Spearman | -0.058            | -0.148                                   | -0.008                              | -0.097                                        | -0.096                                     | -0.209                                        | -0.209                                     | -0.025                        | -0.025                           | 0.038                             | 0.063                                | .301*                                         | 0.207                                       | -0.056                     | -0.067                        | .257*                      | 0.172                      | 0.004                           | -0.010                                     | -0.049                          | 0.001                                      | 0.118              | 0.158                      | 0.165   | -0.016 | -0.002 | -0.011         |
|                      | $p$ -value      | 0.654             | 0.250                                    | 0.954                               | 0.451                                         | 0.456                                      | 0.104                                         | 0.104                                      | 0.846                         | 0.846                            | 0.769                             | 0.627                                | 0.017                                         | 0.106                                       | 0.668                      | 0.604                         | 0.043                      | 0.183                      | 0.977                           | 0.935                                      | 0.703                           | 0.997                                      | 0.360              | 0.219                      | 0.201   | 0.902  | 0.985  | 0.929          |
| DBP                  | $\rho$ Spearman | -0.050            | -0.052                                   | 0.046                               | 0.026                                         | 0.026                                      | -0.058                                        | -0.058                                     | 0.171                         | 0.171                            | 0.023                             | 0.122                                | .338**                                        | 0.090                                       | 0.031                      | 0.010                         | .281*                      | 0.192                      | -0.111                          | -0.228                                     | -0.244                          | -.261*                                     | 0.004              | 0.048                      | 0.139   | -0.171 | -0.157 | -0.131         |
|                      | $p$ -value      | 0.701             | 0.690                                    | 0.722                               | 0.841                                         | 0.841                                      | 0.653                                         | 0.653                                      | 0.184                         | 0.184                            | 0.860                             | 0.345                                | 0.007                                         | 0.488                                       | 0.809                      | 0.941                         | 0.027                      | 0.135                      | 0.391                           | 0.075                                      | 0.056                           | 0.041                                      | 0.973              | 0.711                      | 0.282   | 0.184  | 0.223  | 0.312          |
| Years from diagnosis | $\rho$ Spearman | -.348**           | -0.035                                   | -0.024                              | 0.192                                         | 0.192                                      | -0.172                                        | -0.175                                     | -0.110                        | -0.110                           | .284*                             | 0.120                                | -0.053                                        | 0.111                                       | 0.107                      | 0.123                         | 0.212                      | 0.105                      | -0.002                          | -0.042                                     | 0.178                           | 0.196                                      | 0.083              | 0.087                      | .262*   | 0.028  | -0.027 | 0.164          |
|                      | $p$ -value      | 0.005             | 0.779                                    | 0.851                               | 0.125                                         | 0.126                                      | 0.170                                         | 0.164                                      | 0.383                         | 0.383                            | 0.022                             | 0.342                                | 0.675                                         | 0.380                                       | 0.397                      | 0.330                         | 0.091                      | 0.404                      | 0.986                           | 0.739                                      | 0.155                           | 0.117                                      | 0.509              | 0.491                      | 0.035   | 0.823  | 0.833  | 0.192          |
| UI/Kg/die            | $\rho$ Spearman | 0.092             | 0.122                                    | -0.053                              | 0.071                                         | 0.070                                      | 0.007                                         | -0.002                                     | 0.100                         | 0.100                            | -0.013                            | -0.143                               | -0.138                                        | -0.151                                      | 0.019                      | 0.027                         | 0.078                      | 0.076                      | 0.136                           | 0.113                                      | -0.078                          | -0.019                                     | -0.018             | -0.021                     | -0.037  | -0.003 | 0.121  | -0.003         |
|                      | $p$ -value      | 0.464             | 0.332                                    | 0.675                               | 0.573                                         | 0.580                                      | 0.958                                         | 0.988                                      | 0.428                         | 0.428                            | 0.919                             | 0.255                                | 0.274                                         | 0.230                                       | 0.880                      | 0.833                         | 0.535                      | 0.545                      | 0.280                           | 0.369                                      | 0.538                           | 0.879                                      | 0.886              | 0.866                      | 0.770   | 0.980  | 0.337  | 0.979          |
| Mean Blood Glucose   | $\rho$ Spearman | 0.288             | 0.153                                    | 0.042                               |                                               |                                            |                                               |                                            |                               |                                  | -0.144                            | -0.126                               | -0.225                                        | -.373*                                      | -0.300                     | -0.305                        | -0.171                     | -0.170                     | 0.039                           | 0.010                                      | 0.045                           | 0.035                                      | 0.075              | 0.035                      | -0.222  | 0.046  | 0.062  | 0.151          |

[illegible]

**Table S5.** Correlations between clinical characteristics and IPAQ-A items.

|                      |                 | n° sports lessons | minutes of walking during sports lessons | mins of sport during sports lessons | days vigorous physical activity during school | minutes of vigorous activity during school | days moderate physical activity during school | minutes of moderate activity during school | days of walking during school | minutes of walking during school | days of moderate activity at home | minutes of moderate activity at home | days travelling with motorized transportation | minutes travelling with motorized transport | days travelling using bike | minutes travelling using bike | days of travelling by foot | minutes travelling by foot | other days of vigorous activity | minutes of other days of vigorous activity | other days of moderate activity | minutes other days of moderate activity | other days walking | minutes other days walking | 3,3 MET | 4 MET  | 8 MET  | total MET week |
|----------------------|-----------------|-------------------|------------------------------------------|-------------------------------------|-----------------------------------------------|--------------------------------------------|-----------------------------------------------|--------------------------------------------|-------------------------------|----------------------------------|-----------------------------------|--------------------------------------|-----------------------------------------------|---------------------------------------------|----------------------------|-------------------------------|----------------------------|----------------------------|---------------------------------|--------------------------------------------|---------------------------------|-----------------------------------------|--------------------|----------------------------|---------|--------|--------|----------------|
| Gender               | $\rho$ Spearman | -0.015            | 0.032                                    | 0.132                               | 0.181                                         | 0.181                                      | 0.000                                         | 0.005                                      | 0.127                         | 0.127                            | -0.158                            | -0.213                               | -0.177                                        | 0.137                                       | -0.045                     | -0.011                        | -0.089                     | -0.169                     | 0.132                           | 0.117                                      | 0.071                           | 0.048                                   | -0.035             | -0.039                     | -0.121  | 0.078  | 0.141  | 0.117          |
|                      | $p$ -value      | 0.903             | 0.799                                    | 0.294                               | 0.149                                         | 0.149                                      | 1.000                                         | 0.965                                      | 0.314                         | 0.314                            | 0.208                             | 0.089                                | 0.159                                         | 0.278                                       | 0.721                      | 0.931                         | 0.481                      | 0.180                      | 0.295                           | 0.355                                      | 0.572                           | 0.703                                   | 0.781              | 0.758                      | 0.335   | 0.539  | 0.262  | 0.352          |
| Age                  | $\rho$ Spearman | -.403**           | -.290*                                   | -0.017                              | -0.199                                        | -0.200                                     | -.285*                                        | -.285*                                     | 0.000                         | 0.000                            | .254*                             | .328**                               | 0.100                                         | 0.231                                       | -0.001                     | -0.017                        | .362**                     | .326**                     | -0.098                          | -0.146                                     | 0.099                           | 0.163                                   | 0.178              | 0.175                      | .391**  | -0.051 | -0.147 | 0.014          |
|                      | $p$ -value      | 0.001             | 0.019                                    | 0.895                               | 0.111                                         | 0.110                                      | 0.021                                         | 0.022                                      | 1.000                         | 1.000                            | 0.041                             | 0.008                                | 0.427                                         | 0.064                                       | 0.996                      | 0.893                         | 0.003                      | 0.008                      | 0.438                           | 0.245                                      | 0.434                           | 0.194                                   | 0.157              | 0.163                      | 0.001   | 0.687  | 0.242  | 0.914          |
| Weight z-score       | $\rho$ Spearman | -0.207            | -0.235                                   | -.382**                             | -0.147                                        | -0.148                                     | 0.022                                         | 0.016                                      | -0.193                        | -0.193                           | .306*                             | 0.102                                | 0.058                                         | -0.001                                      | 0.205                      | 0.190                         | 0.001                      | 0.055                      | -0.100                          | -0.231                                     | -0.029                          | -0.073                                  | 0.100              | 0.081                      | 0.175   | -0.174 | -0.158 | -0.133         |
|                      | $p$ -value      | 0.099             | 0.060                                    | 0.002                               | 0.242                                         | 0.238                                      | 0.862                                         | 0.900                                      | 0.123                         | 0.123                            | 0.013                             | 0.417                                | 0.644                                         | 0.992                                       | 0.102                      | 0.129                         | 0.993                      | 0.664                      | 0.429                           | 0.065                                      | 0.817                           | 0.565                                   | 0.427              | 0.520                      | 0.164   | 0.166  | 0.210  | 0.293          |
| Height z-score       | $\rho$ Spearman | 0.110             | 0.074                                    | -0.142                              | -0.039                                        | -0.039                                     | -0.003                                        | -0.006                                     | -0.201                        | -0.201                           | 0.154                             | -0.052                               | -0.024                                        | -0.238                                      | 0.192                      | 0.178                         | 0.036                      | -0.120                     | 0.116                           | -0.006                                     | 0.079                           | 0.056                                   | -0.199             | -0.220                     | -0.058  | -0.005 | 0.088  | 0.077          |
|                      | $p$ -value      | 0.385             | 0.564                                    | 0.264                               | 0.760                                         | 0.759                                      | 0.979                                         | 0.960                                      | 0.111                         | 0.111                            | 0.226                             | 0.681                                | 0.848                                         | 0.059                                       | 0.128                      | 0.158                         | 0.777                      | 0.347                      | 0.363                           | 0.965                                      | 0.535                           | 0.662                                   | 0.114              | 0.081                      | 0.650   | 0.969  | 0.489  | 0.545          |
| BMI                  | $\rho$ Spearman | -.353**           | -.363**                                  | -.398**                             | -0.199                                        | -0.201                                     | -0.060                                        | -0.067                                     | -0.113                        | -0.113                           | .291*                             | 0.188                                | 0.065                                         | 0.201                                       | 0.160                      | 0.150                         | 0.062                      | 0.175                      | -0.199                          | -.296*                                     | -0.019                          | -0.028                                  | .254*              | .242                       | .312*   | -0.185 | -.264* | -0.191         |
|                      | $p$ -value      | 0.004             | 0.003                                    | 0.001                               | 0.114                                         | 0.111                                      | 0.639                                         | 0.601                                      | 0.376                         | 0.376                            | 0.019                             | 0.137                                | 0.609                                         | 0.111                                       | 0.206                      | 0.236                         | 0.627                      | 0.167                      | 0.116                           | 0.017                                      | 0.879                           | 0.827                                   | 0.043              | 0.054                      | 0.012   | 0.144  | 0.035  | 0.132          |
| BMI-SDS              | $\rho$ Spearman | -.298*            | -.314*                                   | -.377**                             | -0.170                                        | -0.172                                     | 0.018                                         | 0.011                                      | -0.119                        | -0.119                           | .296*                             | 0.148                                | 0.076                                         | 0.125                                       | 0.181                      | 0.170                         | 0.009                      | 0.131                      | -0.196                          | -.300*                                     | -0.033                          | -0.066                                  | 0.217              | 0.208                      | .257*   | -0.168 | -.260* | -0.195         |
|                      | $p$ -value      | 0.017             | 0.012                                    | 0.002                               | 0.179                                         | 0.174                                      | 0.886                                         | 0.932                                      | 0.348                         | 0.348                            | 0.018                             | 0.244                                | 0.550                                         | 0.325                                       | 0.153                      | 0.180                         | 0.944                      | 0.301                      | 0.121                           | 0.016                                      | 0.796                           | 0.602                                   | 0.086              | 0.099                      | 0.040   | 0.185  | 0.038  | 0.122          |
| BMI IOTF             | $\rho$ Spearman | -0.159            | -.271*                                   | -.270*                              | -0.221                                        | -0.224                                     | 0.101                                         | 0.096                                      | -0.052                        | -0.052                           | 0.157                             | 0.131                                | 0.144                                         | 0.143                                       | 0.129                      | 0.126                         | 0.033                      | 0.221                      | -0.184                          | -.302*                                     | -0.053                          | -0.045                                  | 0.200              | 0.219                      | 0.201   | -0.076 | -.249* | -0.152         |
|                      | $p$ -value      | 0.210             | 0.031                                    | 0.031                               | 0.079                                         | 0.076                                      | 0.427                                         | 0.452                                      | 0.684                         | 0.684                            | 0.216                             | 0.301                                | 0.258                                         | 0.261                                       | 0.311                      | 0.323                         | 0.793                      | 0.080                      | 0.147                           | 0.015                                      | 0.676                           | 0.724                                   | 0.113              | 0.083                      | 0.112   | 0.550  | 0.047  | 0.231          |
| HbA1c                | $\rho$ Spearman | 0.076             | 0.007                                    | 0.031                               | 0.131                                         | 0.131                                      | -0.087                                        | -0.080                                     | -0.083                        | -0.083                           | -0.153                            | -0.103                               | -0.079                                        | -0.204                                      | -.266*                     | -.276*                        | -0.047                     | -0.225                     | 0.118                           | 0.152                                      | -0.023                          | 0.010                                   | 0.009              | -0.027                     | -0.233  | 0.009  | 0.160  | 0.147          |
|                      | $p$ -value      | 0.547             | 0.957                                    | 0.807                               | 0.300                                         | 0.300                                      | 0.493                                         | 0.528                                      | 0.509                         | 0.509                            | 0.222                             | 0.415                                | 0.529                                         | 0.103                                       | 0.032                      | 0.026                         | 0.710                      | 0.071                      | 0.349                           | 0.226                                      | 0.854                           | 0.935                                   | 0.943              | 0.833                      | 0.062   | 0.945  | 0.203  | 0.242          |
| SBP                  | $\rho$ Spearman | -0.058            | -0.148                                   | -0.008                              | -0.097                                        | -0.096                                     | -0.209                                        | -0.209                                     | -0.025                        | -0.025                           | 0.038                             | 0.063                                | .301*                                         | 0.207                                       | -0.056                     | -0.067                        | .257*                      | 0.172                      | 0.004                           | -0.010                                     | -0.049                          | 0.001                                   | 0.118              | 0.158                      | 0.165   | -0.016 | -0.002 | -0.011         |
|                      | $p$ -value      | 0.654             | 0.250                                    | 0.954                               | 0.451                                         | 0.456                                      | 0.104                                         | 0.104                                      | 0.846                         | 0.846                            | 0.769                             | 0.627                                | 0.017                                         | 0.106                                       | 0.668                      | 0.604                         | 0.043                      | 0.183                      | 0.977                           | 0.935                                      | 0.703                           | 0.997                                   | 0.360              | 0.219                      | 0.201   | 0.902  | 0.985  | 0.929          |
| DBP                  | $\rho$ Spearman | -0.050            | -0.052                                   | 0.046                               | 0.026                                         | 0.026                                      | -0.058                                        | -0.058                                     | 0.171                         | 0.171                            | 0.023                             | 0.122                                | .338**                                        | 0.090                                       | 0.031                      | 0.010                         | .281*                      | 0.192                      | -0.111                          | -0.228                                     | -0.244                          | -.261*                                  | 0.004              | 0.048                      | 0.139   | -0.171 | -0.157 | -0.131         |
|                      | $p$ -value      | 0.701             | 0.690                                    | 0.722                               | 0.841                                         | 0.841                                      | 0.653                                         | 0.653                                      | 0.184                         | 0.184                            | 0.860                             | 0.345                                | 0.007                                         | 0.488                                       | 0.809                      | 0.941                         | 0.027                      | 0.135                      | 0.391                           | 0.075                                      | 0.056                           | 0.041                                   | 0.973              | 0.711                      | 0.282   | 0.184  | 0.223  | 0.312          |
| Years from diagnosis | $\rho$ Spearman | -.348**           | -0.035                                   | -0.024                              | 0.192                                         | 0.192                                      | -0.172                                        | -0.175                                     | -0.110                        | -0.110                           | .284*                             | 0.120                                | -0.053                                        | 0.111                                       | 0.107                      | 0.123                         | 0.212                      | 0.105                      | -0.002                          | -0.042                                     | 0.178                           | 0.196                                   | 0.083              | 0.087                      | .262*   | 0.028  | -0.027 | 0.164          |
|                      | $p$ -value      | 0.005             | 0.779                                    | 0.851                               | 0.125                                         | 0.126                                      | 0.170                                         | 0.164                                      | 0.383                         | 0.383                            | 0.022                             | 0.342                                | 0.675                                         | 0.380                                       | 0.397                      | 0.330                         | 0.091                      | 0.404                      | 0.986                           | 0.739                                      | 0.155                           | 0.117                                   | 0.509              | 0.491                      | 0.035   | 0.823  | 0.833  | 0.192          |
| UI/Kg/die            | $\rho$ Spearman | 0.092             | 0.122                                    | -0.053                              | 0.071                                         | 0.070                                      | 0.007                                         | -0.002                                     | 0.100                         | 0.100                            | -0.013                            | -0.143                               | -0.138                                        | -0.151                                      | 0.019                      | 0.027                         | 0.078                      | 0.076                      | 0.136                           | 0.113                                      | -0.078                          | -0.019                                  | -0.018             | -0.021                     | -0.037  | -0.003 | 0.121  | -0.003         |
|                      | $p$ -value      | 0.464             | 0.332                                    | 0.675                               | 0.573                                         | 0.580                                      | 0.958                                         | 0.988                                      | 0.428                         | 0.428                            | 0.919                             | 0.255                                | 0.274                                         | 0.230                                       | 0.880                      | 0.833                         | 0.535                      | 0.545                      | 0.280                           | 0.369                                      | 0.538                           | 0.879                                   | 0.886              | 0.866                      | 0.770   | 0.980  | 0.337  | 0.979          |
| Mean Blood Glucose   | $\rho$ Spearman | 0.288             | 0.153                                    | 0.042                               |                                               |                                            |                                               |                                            |                               |                                  |                                   |                                      |                                               |                                             |                            |                               |                            |                            |                                 |                                            |                                 |                                         |                    |                            |         |        |        |                |
|                      | $p$ -value      |                   |                                          |                                     |                                               |                                            |                                               |                                            |                               |                                  |                                   |                                      |                                               |                                             |                            |                               |                            |                            |                                 |                                            |                                 |                                         |                    |                            |         |        |        |                |

|                   |                 |        |        |        |        |        |        |        |        |        |        |        |        |       |        |        |        |        |        |        |        |        |        |        |        |        |        |        |
|-------------------|-----------------|--------|--------|--------|--------|--------|--------|--------|--------|--------|--------|--------|--------|-------|--------|--------|--------|--------|--------|--------|--------|--------|--------|--------|--------|--------|--------|--------|
|                   | <i>p</i> -value | 0.116  | 0.411  | 0.823  |        |        |        |        |        |        | 0.440  | 0.500  | 0.223  | 0.039 | 0.101  | 0.095  | 0.358  | 0.360  | 0.834  | 0.959  | 0.810  | 0.852  | 0.689  | 0.850  | 0.231  | 0.806  | 0.739  | 0.416  |
| TIR %             | $\rho$ Spearman | -0.205 | -0.086 | 0.009  |        |        |        |        |        |        | 0.175  | 0.255  | 0.173  | .353* | 0.320  | 0.328  | 0.158  | 0.238  | -0.024 | 0.021  | 0.070  | 0.081  | -0.067 | -0.036 | 0.303  | 0.081  | -0.042 | 0.001  |
|                   | <i>p</i> -value | 0.260  | 0.639  | 0.959  |        |        |        |        |        |        | 0.339  | 0.158  | 0.344  | 0.047 | 0.075  | 0.067  | 0.386  | 0.189  | 0.897  | 0.908  | 0.704  | 0.660  | 0.716  | 0.845  | 0.091  | 0.660  | 0.820  | 0.994  |
| Total Cholesterol | $\rho$ Spearman | 0.017  | -0.064 | 0.049  | -0.176 | -0.176 | 0.111  | 0.114  | 0.158  | 0.158  | -0.006 | 0.000  | -0.095 | 0.062 | -0.020 | 0.006  | -0.244 | -0.120 | -0.028 | -0.019 | 0.115  | 0.107  | 0.154  | 0.147  | -0.009 | 0.113  | -0.042 | 0.037  |
|                   | <i>p</i> -value | 0.899  | 0.624  | 0.707  | 0.175  | 0.175  | 0.393  | 0.383  | 0.225  | 0.225  | 0.961  | 0.998  | 0.468  | 0.634 | 0.878  | 0.963  | 0.058  | 0.356  | 0.828  | 0.884  | 0.377  | 0.413  | 0.237  | 0.258  | 0.943  | 0.384  | 0.747  | 0.775  |
| HDL Cholesterol   | $\rho$ Spearman | 0.073  | 0.123  | 0.150  | 0.132  | 0.132  | .266*  | .265*  | 0.161  | 0.161  | 0.047  | 0.046  | -0.087 | 0.103 | 0.080  | 0.097  | -0.105 | -0.060 | 0.033  | 0.033  | 0.113  | 0.059  | -0.045 | -0.023 | -0.028 | 0.109  | 0.039  | 0.066  |
|                   | <i>p</i> -value | 0.572  | 0.341  | 0.245  | 0.305  | 0.305  | 0.037  | 0.037  | 0.211  | 0.211  | 0.715  | 0.720  | 0.504  | 0.424 | 0.536  | 0.454  | 0.415  | 0.643  | 0.800  | 0.799  | 0.383  | 0.647  | 0.726  | 0.860  | 0.830  | 0.398  | 0.766  | 0.611  |
| Triglycerides     | $\rho$ Spearman | 0.006  | -0.183 | -0.190 | -0.129 | -0.129 | -0.154 | -0.152 | 0.100  | 0.100  | -0.074 | -0.068 | 0.120  | 0.039 | 0.016  | -0.001 | -0.106 | -0.044 | -0.022 | -0.100 | -0.242 | -0.200 | .312*  | .302*  | 0.017  | -0.182 | -0.048 | -0.047 |
|                   | <i>p</i> -value | 0.964  | 0.155  | 0.138  | 0.318  | 0.318  | 0.233  | 0.237  | 0.438  | 0.438  | 0.566  | 0.598  | 0.355  | 0.761 | 0.900  | 0.994  | 0.412  | 0.736  | 0.865  | 0.441  | 0.058  | 0.119  | 0.014  | 0.017  | 0.897  | 0.156  | 0.710  | 0.719  |
| LDL Cholesterol   | $\rho$ Spearman | -0.052 | -0.093 | -0.005 | -0.188 | -0.188 | -0.041 | -0.039 | 0.102  | 0.102  | 0.008  | 0.019  | -0.078 | 0.007 | -0.006 | 0.009  | -0.182 | -0.085 | -0.034 | -0.011 | 0.102  | 0.122  | 0.181  | 0.160  | 0.043  | 0.088  | -0.046 | 0.023  |
|                   | <i>p</i> -value | 0.694  | 0.481  | 0.968  | 0.150  | 0.150  | 0.753  | 0.767  | 0.440  | 0.440  | 0.950  | 0.888  | 0.555  | 0.959 | 0.961  | 0.943  | 0.164  | 0.518  | 0.798  | 0.934  | 0.437  | 0.353  | 0.166  | 0.222  | 0.744  | 0.503  | 0.725  | 0.863  |
| Insulin 1/2       | $\rho$ Spearman | 0.014  | 0.011  | 0.187  | -0.119 | -0.119 | -0.119 | -0.119 | -0.083 | -0.083 | 0.015  | 0.157  | -0.016 | 0.179 | 0.018  | 0.046  | 0.073  | 0.097  | 0.024  | -0.013 | 0.079  | 0.036  | -0.125 | -0.107 | 0.004  | 0.132  | 0.000  | 0.053  |
|                   | <i>p</i> -value | 0.913  | 0.931  | 0.135  | 0.346  | 0.346  | 0.346  | 0.346  | 0.509  | 0.509  | 0.907  | 0.212  | 0.898  | 0.155 | 0.888  | 0.717  | 0.566  | 0.443  | 0.849  | 0.921  | 0.529  | 0.777  | 0.321  | 0.394  | 0.972  | 0.294  | 1.000  | 0.673  |
